# Supplementary material for: Fabrication of high-performance and low-hysteresis lead halide perovskite solar cells by utilizing a versatile alcohol-soluble bispyridinium salt as an efficient cathode modifier
Source: Royal Society of Chemistry journal article supplement (doi:10.1039/c7ta04995a), 2017-01-01
Supplement: c7ta04995a1.pdf [file c7ta04995a1.pdf]

## Supporting Information

### High-Performance and Low-Hysteresis Lead Halide Perovskite Solar Cells by Utilizing a Versatile Alcohol-Soluble Bipyridinium Salt as an Efficient Cathode Modifier

Guiting Chen,<sup>†a</sup> Fan Zhang,<sup>†b</sup> Meiyue Liu,<sup>a</sup> Jun Song,<sup>\*b</sup> Jiarong Lian,<sup>b</sup> Pengju Zeng,<sup>b</sup> Hin-Lap Yip,<sup>\*a</sup> Wei Yang,<sup>a</sup> Bin Zhang<sup>\*ab</sup> and Yong Cao<sup>a</sup>

<sup>a</sup> Institute of Polymer Optoelectronic Materials and Devices, State Key Laboratory of Luminescent Materials and Devices, South China University of Technology, Guangzhou, 510640, China. E-mail: msbzhong@scut.edu.cn; msangusyip@scut.edu.cn.

<sup>b</sup> Key Laboratory of Optoelectronic Devices and Systems of Ministry of Education and Guangdong Province, College of Optoelectronic Engineering, Shenzhen University, Shenzhen, 518060, China. E-mail: songjun@szu.edu.cn.

<sup>†</sup> G. Chen and F. Zhang contributed equally.

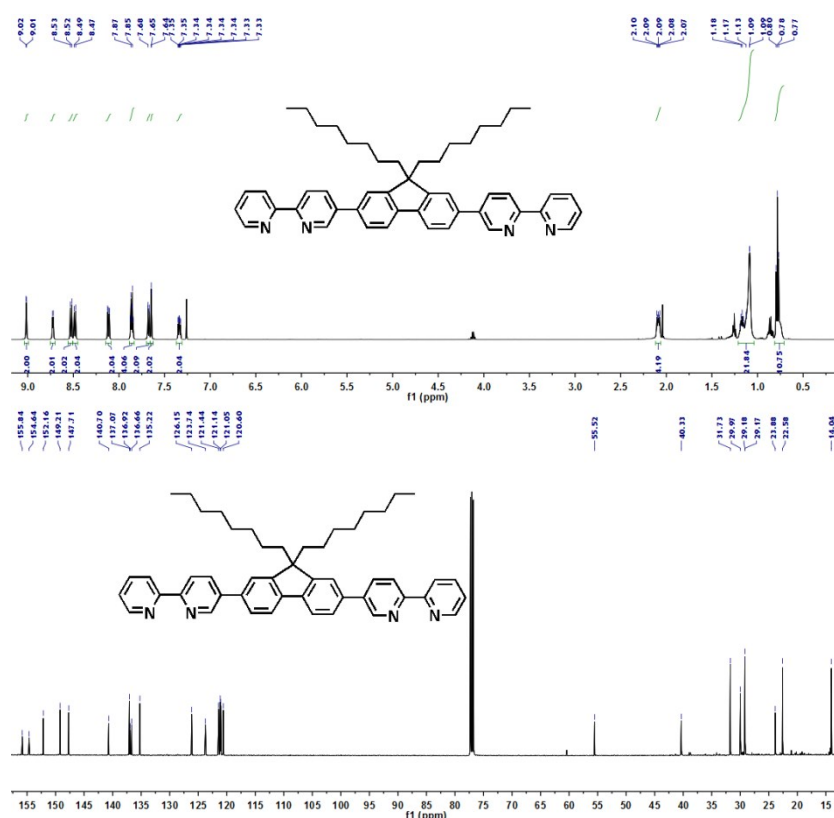

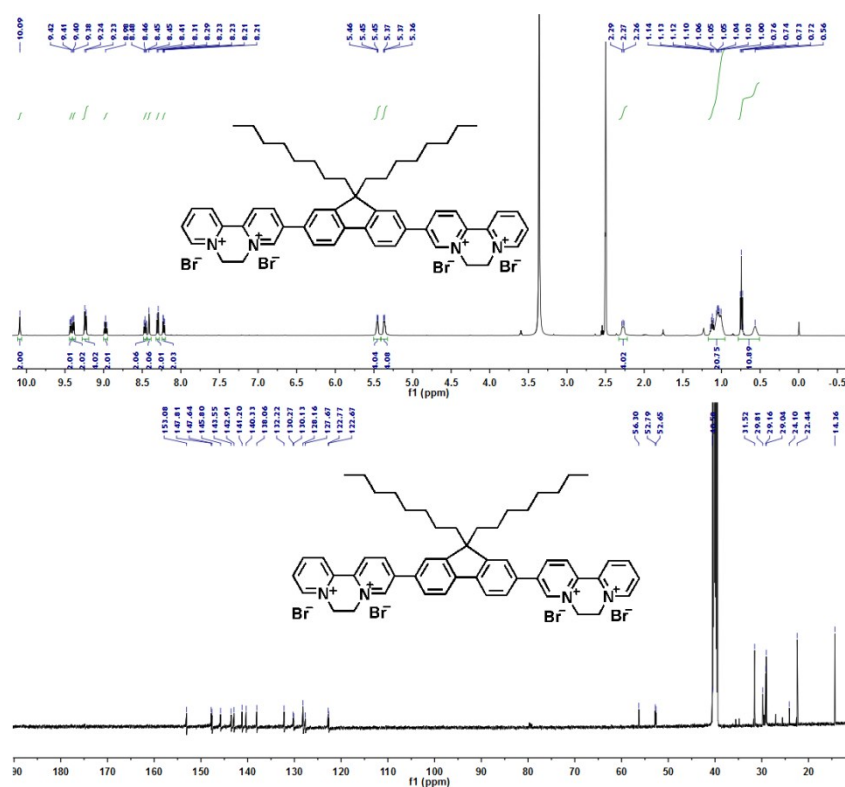

**Figure S2.**  $^1\text{H}$  and  $^{13}\text{C}$  NMR spectra of **FPyBr** in  $\text{DMSO-d}_6$ .

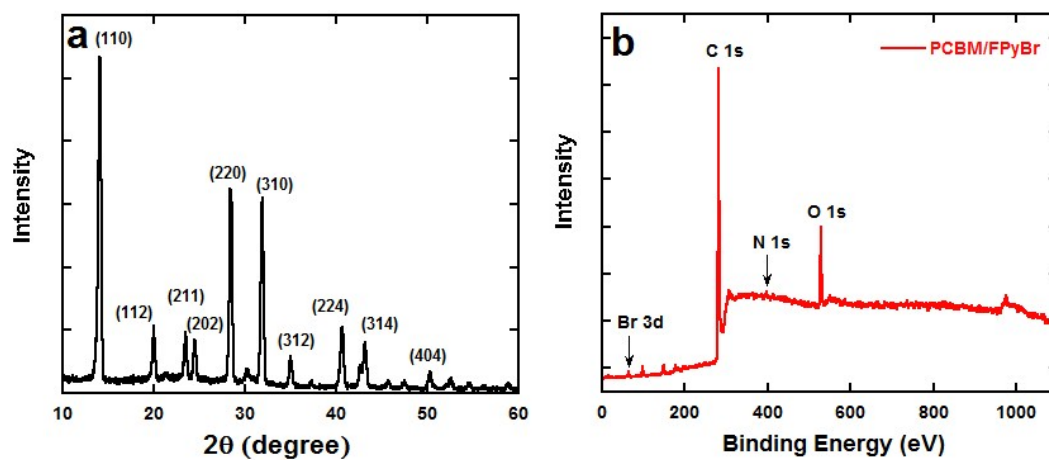

**Figure S3.** a) XRD pattern of ITO/PEDOT:PSS/PTAA/MAPbI<sub>3</sub>, b) XPS spectrum of ITO/PCBM/**FPyBr** surface. The deposition conditions of all the films were the same as those for the PVSC fabrications.

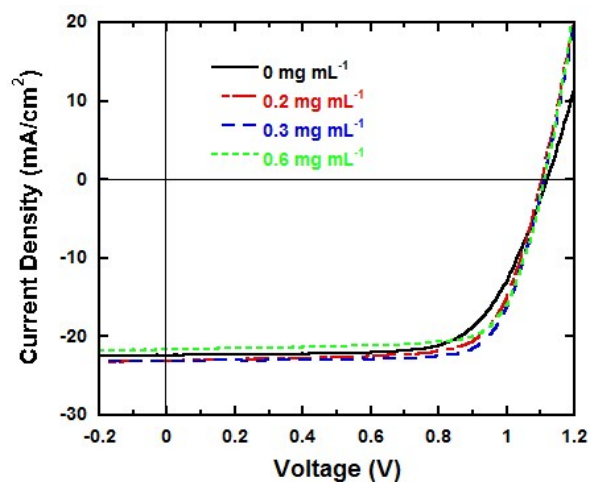

**Figure S4.**  $J$ - $V$  curves of the PVSCs with **FPyBr** CILs deposited from its ethanol solutions with different concentrations (forward scan)

**Table S1.** Data summary of the PVSCs with **FPyBr** CILs deposited from its ethanol solutions with different concentrations (forward scan).

| Concentration<br>(mg mL <sup>-1</sup> ) | $V_{oc}$ (V) | $J_{sc}$ (mA cm <sup>-2</sup> ) | FF (%) | PCE (%) |
|-----------------------------------------|--------------|---------------------------------|--------|---------|
| 0 (pure ethanol)                        | 1.11         | 22.36                           | 68.9   | 17.22   |
| 0.2                                     | 1.10         | 23.06                           | 72.6   | 18.45   |
| 0.3                                     | 1.11         | 23.11                           | 75.4   | 19.32   |
| 0.6                                     | 1.11         | 21.64                           | 74.8   | 17.99   |

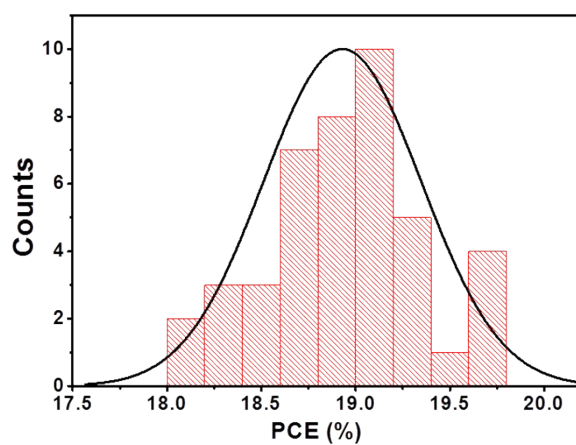

**Figure S5.** Histogram of the PCE values of **FPyBr**-based 43 PVSC devices.

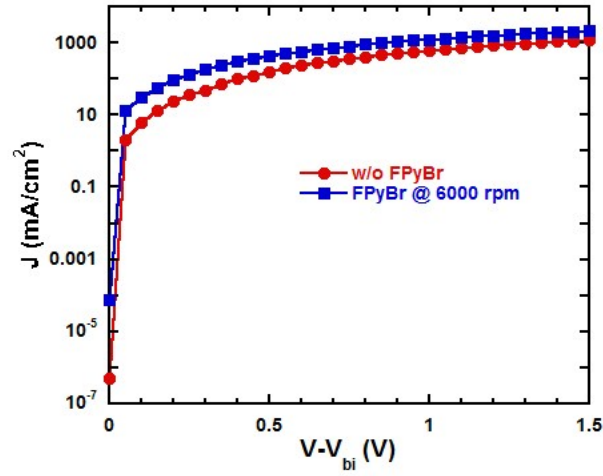

**Figure S6.**  $J$ - $V$  curves of the electron-only devices with or without **FPyBr** CIL (device structure: Al/PCBM/CIL/Al).

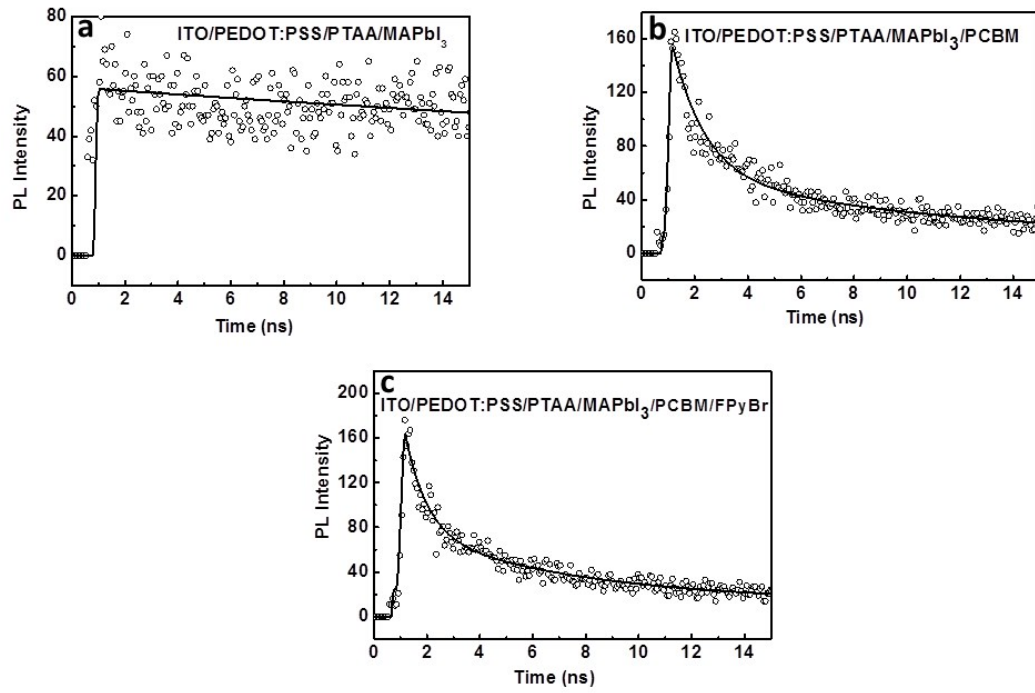

**Figure S7.** The pristine and fitted TRPL decay measurements of different samples.
